# Supplementary material for: Examination of Changes in Health Status Among Michigan Medicaid Expansion Enrollees From 2016 to 2017
Source: PubMed Central journal article supplement (PMC7352154; doi:10.1001/jamanetworkopen.2020.8776), 2020-07-10
Supplement: jamanetwopen-3-e208776-s001.pdf [file jamanetwopen-3-e208776-s001.pdf]

## Supplementary Online Content

Patel MR, Tipireni R, Kieffer EC, et al. Examination of changes in health status among Michigan Medicaid expansion enrollees from 2016 to 2017. *JAMA Netw Open*. 2020;3(7):e208776. doi:10.1001/jamanetworkopen.2020.8776

**eTable.** Comparison of Characteristics of 2017 Enrollee Follow-up Survey Respondents and Nonrespondents

This supplementary material has been provided by the authors to give readers additional information about their work.

**eTable. Comparison of Characteristics of 2017 Enrollee Follow-up Survey Respondents and Nonrespondents**

| <b>Characteristics</b>    | <b>Respondents<br/>(n=3,104)<br/>%</b> | <b>Nonrespondents<br/>(n=608)<br/>%</b> | <b>p value</b> |
|---------------------------|----------------------------------------|-----------------------------------------|----------------|
| <b>Age</b>                |                                        |                                         |                |
| 19-34                     | 40.1                                   | 49.7                                    | <0.001         |
| 35-50                     | 29.5                                   | 30.0                                    |                |
| 51-64                     | 30.5                                   | 20.3                                    |                |
| <b>Gender</b>             |                                        |                                         |                |
| Male                      | 47.2                                   | 48.7                                    | 0.612          |
| Female                    | 52.8                                   | 51.3                                    |                |
| <b>Race/Ethnicity</b>     |                                        |                                         |                |
| Non-Hispanic White        | 60.3                                   | 60.8                                    | 0.881          |
| Other                     | 39.7                                   | 39.2                                    |                |
| <b>FPL category</b>       |                                        |                                         |                |
| 0-35% FPL                 | 53.1                                   | 45.6                                    | 0.018          |
| 36-99% FPL                | 27.7                                   | 32.1                                    |                |
| 100-133% FPL              | 19.1                                   | 22.3                                    |                |
| <b>Interview language</b> |                                        |                                         |                |
| Arabic                    | 0.8                                    | 5.3                                     | <0.001         |
| English                   | 98.7                                   | 93.6                                    |                |
| Spanish                   | 0.5                                    | 1.2                                     |                |
| <b>Geographic Region</b>  |                                        |                                         |                |
| Northern Michigan         | 8.9                                    | 9.4                                     | 0.249          |
| Central Michigan          | 29.3                                   | 24.8                                    |                |
| Southern Michigan         | 18.1                                   | 20.5                                    |                |
| Detroit Metro             | 43.7                                   | 45.3                                    |                |

Notes: Chi-square test of independence
